# Supplementary material for: Breaking the Fear Barrier: Aberrant Activity of Fear Networks as a Prognostic Biomarker in Patients with Panic Disorder Normalized by Pharmacotherapy
Source: MDPI journal article supplement (doi:10.3390/biomedicines11092420), 2023-08-29
Supplement: s1 [file s1]

Figure S1: Violin plots depicting demographic and clinical data for all participants.

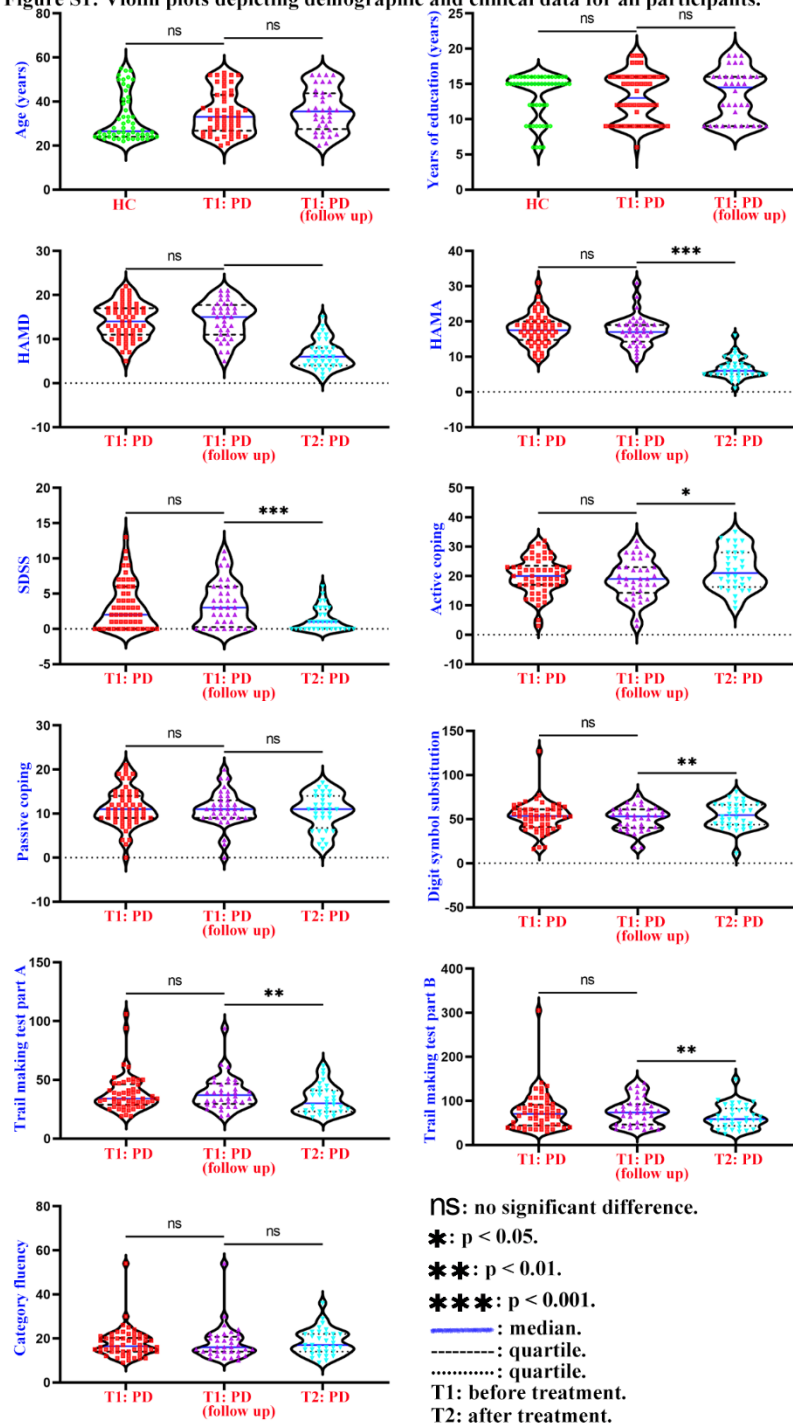

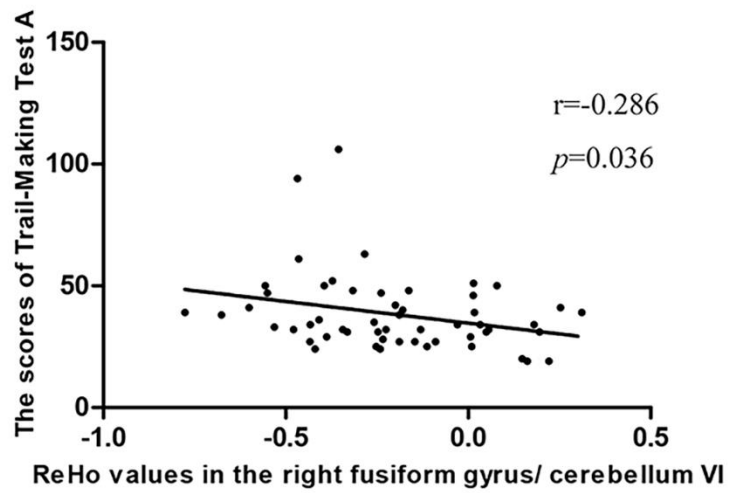

**Figure S2:** Abnormal ReHo values in right fusiform gyrus/cerebellum VI were negatively correlated with the scores of TMT-A ( $r = -0.286$ ,  $p = 0.036$ ).

**Table S1.** Characteristics of patients who finished the follow-up.

| Variables                     | Pre-treatment<br>(Mean $\pm$ SD,<br>n=36) | Post-treatment<br>(Mean $\pm$ SD,<br>n=36) | Z/T   | p                   | df | r/Cohen's d |
|-------------------------------|-------------------------------------------|--------------------------------------------|-------|---------------------|----|-------------|
| Age (years)                   | 36.06 $\pm$ 9.75                          |                                            |       |                     |    |             |
| Sex (male/female)             | 16/20                                     |                                            |       |                     |    |             |
| Years of<br>education (years) | 13.42 $\pm$ 3.59                          |                                            |       |                     |    |             |
| Illness duration<br>(months)  | 17.83 $\pm$ 25.51                         |                                            |       |                     |    |             |
| Time of treatment<br>(days)   | 34.81 $\pm$ 7.09                          |                                            |       |                     |    |             |
| HAMD                          | 14.32 $\pm$ 4.28                          | 6.47 $\pm$ 3.29                            | -5.09 | <0.001 <sup>a</sup> | 35 | -0.62       |
| HAMA                          | 17.32 $\pm$ 4.49                          | 6.68 $\pm$ 2.95                            | -5.09 | <0.001 <sup>a</sup> | 35 | -0.62       |
| SDSS                          | 3.50 $\pm$ 2.96                           | 1.31 $\pm$ 1.69                            | -3.90 | <0.001 <sup>a</sup> | 35 | -0.47       |
| CSQ                           |                                           |                                            |       |                     |    |             |
| Active coping                 | 19.34 $\pm$ 6.93                          | 22.06 $\pm$ 6.93                           | 2.51  | 0.017 <sup>b</sup>  | 35 | 0.39        |
| Passive coping                | 10.81 $\pm$ 4.09                          | 10.41 $\pm$ 4.13                           | -0.51 | 0.611 <sup>b</sup>  | 35 | -0.10       |
| B-CATS                        |                                           |                                            |       |                     |    |             |
| Digit symbol<br>substitution  | 49.85 $\pm$ 13.86                         | 54.24 $\pm$ 14.49                          | 3.35  | 0.002 <sup>b</sup>  | 35 | 0.31        |
| Trail making test<br>part A   | 38.94 $\pm$ 14.55                         | 33.06 $\pm$ 11.95                          | -2.64 | 0.008 <sup>a</sup>  | 35 | -0.32       |
| Trail making test<br>part B   | 74.62 $\pm$ 28.94                         | 63.79 $\pm$ 26.86                          | -2.90 | 0.004 <sup>a</sup>  | 35 | -0.35       |
| Category fluency              | 17.94 $\pm$ 7.78                          | 18.29 $\pm$ 5.91                           | -1.38 | 0.167 <sup>a</sup>  | 35 | -0.17       |

<sup>a</sup> The *p*-values were obtained by Wilcoxon signed-rank tests.

<sup>b</sup> The *p*-values were obtained by paired *t*-tests.

SD = standard deviation; HAMD = Hamilton Depression Rating Scale; HAMA = Hamilton Anxiety Rating Scale; SDSS = Social Disability Screening Schedule; CSQ = Simplified Coping Style Questionnaire; B-CATS = Brief Cognitive Assessment Tool for Schizophrenia.
